# Supplementary material
Source: publisher figshare collection journal article supplement (https://acs.figshare.com/ndownloader/files/7422370)
Supplement: Supplementary file 1 [file 7422370]

## **Supporting Information**

### **Use of Primary and Secondary Polyvinylamines for Efficient Gene Transfection**

Mathilde Dréan,<sup>a,b</sup> Antoine Debuigne,<sup>b</sup> Cristine Goncalves,<sup>c</sup> Christine Jérôme<sup>b</sup>, Patrick Midoux,<sup>c</sup> Jutta Rieger,<sup>a</sup> Philippe Guégan<sup>a</sup>

a Sorbonne Universités, UPMC Univ Paris 06, CNRS, Institut Parisien de Chimie Moléculaire, Equipe Chimie des Polymères, 4 Place Jussieu, F-75005 Paris, France.

b Center for Education and Research on Macromolecules (CERM), Department of Chemistry, University of Liege (ULg), Sart-Tilman, Allée de la Chimie 3, Bat. B6a, B-4000 Liège, Belgium.

c Centre de Biophysique Moléculaire, UPR4301 CNRS, Rue Charles Sadron, 45071 Orléans Cedex 2, France

**Table S1.** Determination of the hydrolysis level of the poly(*N*-vinylamines) (PVAm) and poly(*N*-methylvinylamines) (PMVAm) by elemental analysis.

| Entry | Polymer                  | %C <sup>e</sup> | %N <sup>e</sup> | C/N <sub>exp</sub> <sup>e</sup> | C/N <sub>theor.</sub> <sup>f</sup><br>full hydrolysis | % of<br>hydrolysis <sup>g</sup> |
|-------|--------------------------|-----------------|-----------------|---------------------------------|-------------------------------------------------------|---------------------------------|
| 1     | PN700-Fs <sup>a</sup>    | 32.115          | 17.650          | 2.904                           | 1.716                                                 | 94                              |
| 2     | PN150-Cs <sup>a</sup>    | n.d.            | n.d.            | n.d.                            | n.d.                                                  | n.d.                            |
| 3     | PN255-Cs <sup>a</sup>    | 33.105          | 17.675          | 1.873                           | 1.716                                                 | 91 <sup>h</sup>                 |
| 4     | PN660-Cs <sup>a</sup>    | 32.595          | 18.085          | 1.802                           | 1.716                                                 | 94 <sup>h</sup>                 |
| 5     | PN940-Cs <sup>a</sup>    | 32.080          | 17.630          | 1.820                           | 1.716                                                 | 95 <sup>h</sup>                 |
| 6     | PN1510-Cs <sup>a</sup>   | 32.485          | 17.930          | 1.812                           | 1.716                                                 | 94 <sup>h</sup>                 |
| 7     | PN50-R <sup>b</sup>      | 32.420          | 17.920          | 1.809                           | 1.716                                                 | 99 <sup>i</sup>                 |
| 8     | PN170-R <sup>b</sup>     | 32.840          | 17.875          | 1.837                           | 1.716                                                 | 98 <sup>i</sup>                 |
| 9     | PN200-R <sup>b</sup>     | 31.825          | 18.150          | 1.753                           | 1.716                                                 | ≥ 99 <sup>i</sup>               |
| 10    | PM100-Fh <sup>c</sup>    | 41.620          | 14.105          | 2.951                           | 2.573                                                 | 78 <sup>j</sup>                 |
| 11    | PM140-Fh <sup>c</sup>    | 38.945          | 13.410          | 2.904                           | 2.573                                                 | 81 <sup>j</sup>                 |
| 12    | PM165-Fh <sup>c</sup>    | 41.700          | 14.975          | 2.785                           | 2.573                                                 | 88 <sup>j</sup>                 |
| 14    | PM285-Fh <sup>c</sup>    | 46.165          | 15.060          | 3.065                           | 2.573                                                 | 71 <sup>j</sup>                 |
| 15    | PM110-Ch <sup>c</sup>    | 43.630          | 15.135          | 2.883                           | 2.573                                                 | 82 <sup>j</sup>                 |
| 16    | PM265-Ch <sup>c</sup>    | 43.895          | 15.680          | 2.799                           | 2.573                                                 | 87 <sup>j</sup>                 |
| 17    | PM310-Ch <sup>c</sup>    | 42.400          | 15.700          | 2.701                           | 2.573                                                 | 93 <sup>j</sup>                 |
| 18    | PM680-Ch <sup>c</sup>    | 43.610          | 16.010          | 2.724                           | 2.573                                                 | 91 <sup>j</sup>                 |
| 19    | PM155-Fm 23 <sup>d</sup> | 52.480          | 13.450          | 3.902                           | 2.573                                                 | 23 <sup>j</sup>                 |
| 20    | PM155-Fm 37 <sup>d</sup> | 50.800          | 13.935          | 3.645                           | 2.573                                                 | 37 <sup>j</sup>                 |
| 21    | PM155-Fm 44 <sup>d</sup> | 48.570          | 13.740          | 3.535                           | 2.573                                                 | 44 <sup>j</sup>                 |
| 22    | PM155-Fm 54 <sup>d</sup> | 46.665          | 13.940          | 3.348                           | 2.573                                                 | 54 <sup>j</sup>                 |
| 23    | PM155-Fm 64 <sup>d</sup> | 44.345          | 13.895          | 3.191                           | 2.573                                                 | 64 <sup>j</sup>                 |
| 24    | PM155-Fm 76 <sup>d</sup> | 43.760          | 14.670          | 2.983                           | 2.573                                                 | 76 <sup>j</sup>                 |
| 25    | PM155-Fm 94 <sup>d</sup> | 42.005          | 15.695          | 2.676                           | 2.573                                                 | 94 <sup>j</sup>                 |

<sup>a</sup> Hydrolysis conditions: HCl 2 N at 120°C for 14h. <sup>b</sup> Hydrazinolysis conditions: [NVPi]/[hydrazine] = 1/24, in 1,4-dioxane/MeOH 1/2 at 65°C for one night. <sup>c</sup> Hydrolysis conditions: HCl 6 N at 120°C for 64 h. <sup>d</sup> Hydrolysis conditions: HCl 3 N at 100°C. <sup>e</sup> Determined by elementary analysis. <sup>f</sup> Calculated for full hydrolysis of the amides moieties. <sup>g</sup> NVA hydrolysis level = 100 × (1- $f_{NVA\ residual}$ ) where  $f_{NVA\ residual}$  is the molar fraction of the residual non-hydrolyzed NVA units, and NMVA hydrolysis level = 100 × (1- $f_{NMVA\ residual}$ ) where  $f_{NMVA\ residual}$  is the molar fraction of the residual non-hydrolyzed NMVA units. <sup>h-j</sup>  $f_{NVA\ residual}$ ,  $f_{NMVA\ residual}$  and  $f_{NVPi\ residual}$  are determined based on formulas h-j (see below) established by taking into account the molar fraction of each comonomer in the copolymer precursor ( $F_{NVA}^0$ ,  $F_{NMVA}^0$  and  $F_{NVPi}^0$ ) and the respective numbers of carbon and nitrogen atoms in the hydrolyzed and non-hydrolyzed monomer units.  $MM_C$  and  $MM_N$  are the molar mass of C and N, respectively. n.d. = not determined.

$$^h F_{NVA\ residual} = \frac{[MM_N \times \frac{C}{N}] - [2 \times MM_C]}{2 \times MM_C}$$

$$^i F_{residual\ NVPi} = \frac{[MM_N \times \frac{C}{N}] - [2 \times MM_C]}{8 \times MM_C}$$

$$^j F_{NMVA\ residual} = \frac{[MM_N \times \frac{C}{N}] - [3 \times MM_C]}{2 \times MM_C}$$

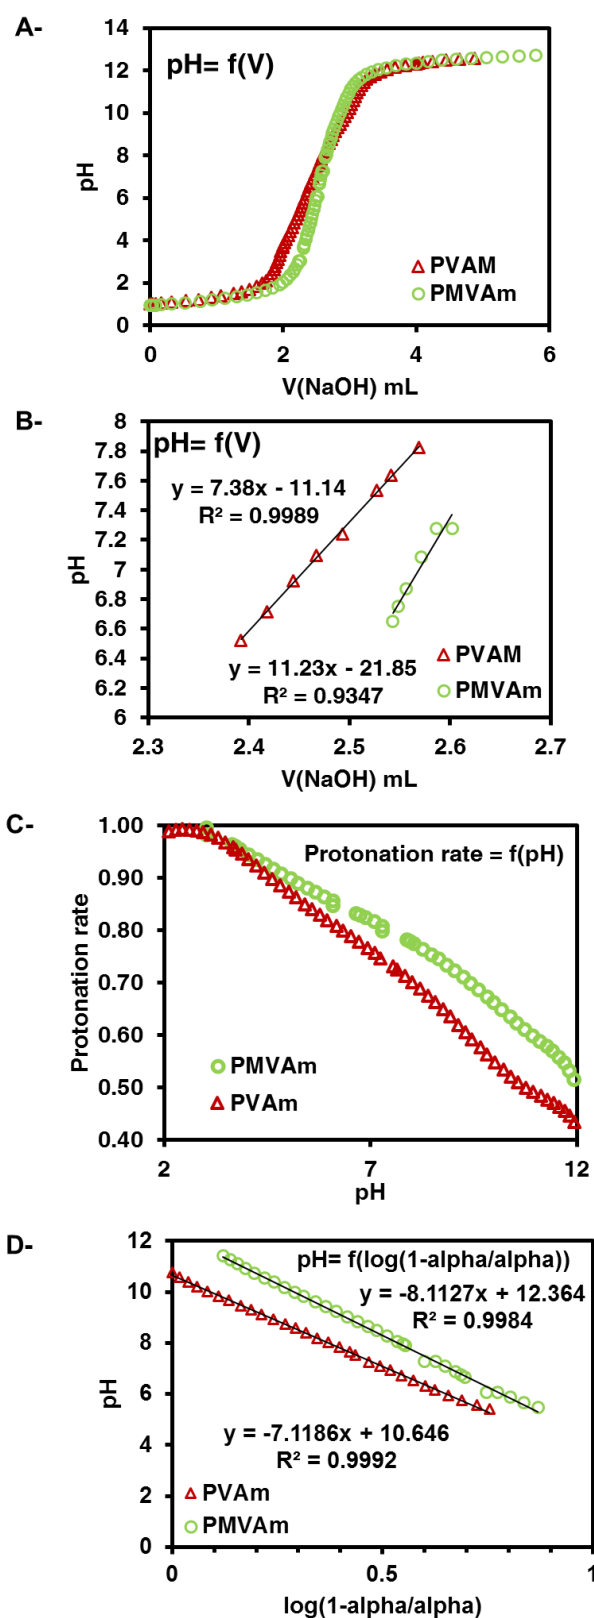

**Figure S1.** (A) Titration curves of aqueous solutions of PN255-Cs (PVAm) and PM140-Fh (PMVAm) (50 mg/ml in 10 mL of HCl 1M) with 0.5M NaOH, (B) linear regression of the titration curves of aqueous solutions of PN255-Cs and PM140-Fh in order to determine their buffer capacities between  $6.5 < \text{pH} < 7.5$ , (C) the resulting protonation curves versus the pH and (D) determination of the pKa.

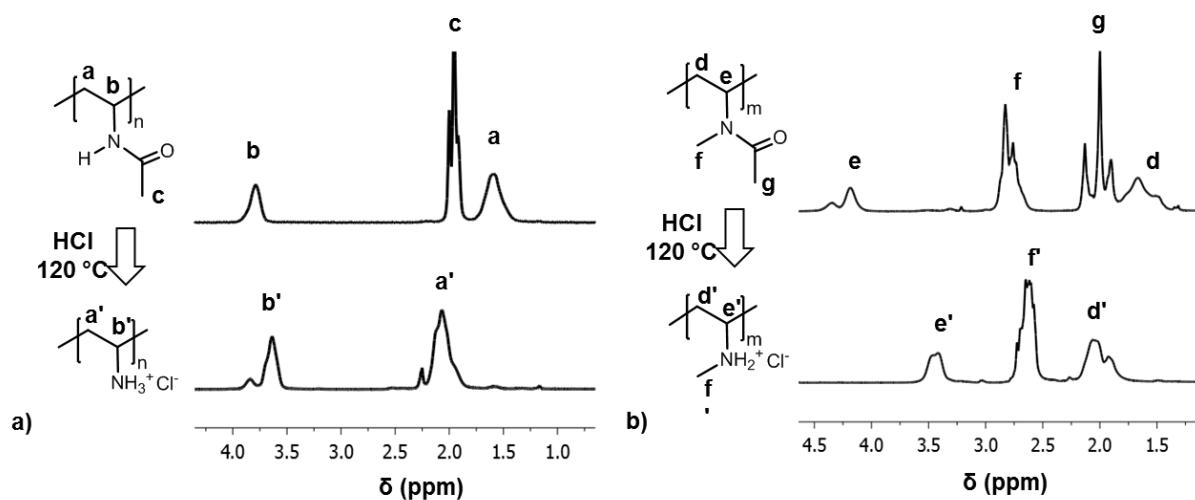

**Figure S2.**  $^1\text{H}$  NMR analyses of **a)** PNVA ( $M_n$  SEC-MALLS = 56300 g/mol,  $D$  = 1.18) and **b)** PNMVA ( $M_n$  SEC-MALLS = 30800 g/mol,  $D$  = 1.12) samples before and after acid hydrolysis (6 N HCl/120°C). Spectra were recorded at 298K in  $\text{D}_2\text{O}$ .

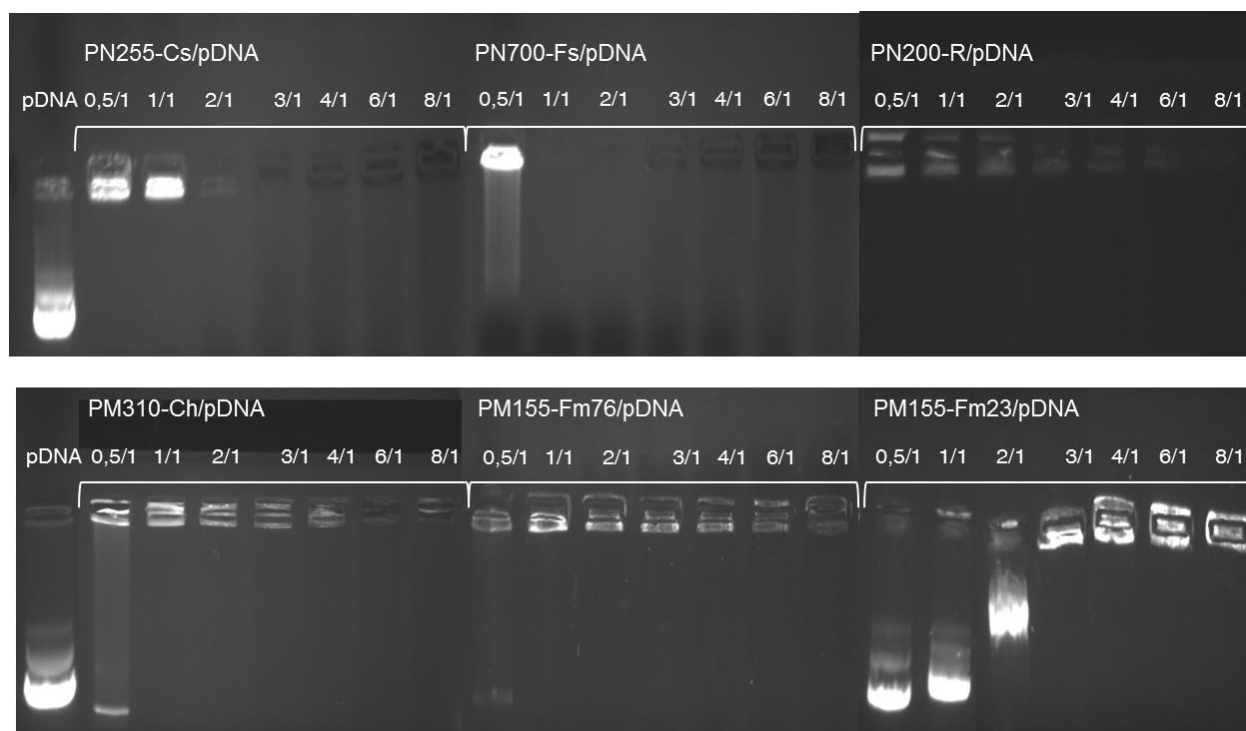

**Figure S3.** Agarose gel electrophoresis retardation assays of polyplexes made with different polyvinylamines (PN) (top) and poly(*N*-methylvinylamines) (PM) (bottom). Polyplexes were formed with various polymer/pDNA weight ratios (WR).

**Table S2.** Characteristics of polyvinylamine (PVAm) synthesized by RAFT polymerization of *N*-vinylphthalimide and successive hydrazinolysis.

| Entry | Name    | PNVPi <sup>a</sup> |                                     |          |             |              | PVAm <sup>b</sup>                   |                                |
|-------|---------|--------------------|-------------------------------------|----------|-------------|--------------|-------------------------------------|--------------------------------|
|       |         | $M_{n,th}^c$       | $M_n^{LS}$<br>(kg/mol) <sup>d</sup> | $DP_n^e$ | $\bar{D}^f$ | Conv.<br>(%) | % of<br>hydrazinolysis <sup>g</sup> | $M_n$<br>(kg/mol) <sup>h</sup> |
| 1     | PN50-R  | 5                  | 8                                   | 46       | 1.43        | > 99         | 99                                  | 2.0                            |
| 2     | PN170-R | 21                 | 29                                  | 167      | 1.52        | 81           | 98                                  | 7.2                            |
| 3     | PN200-R | 23                 | 35                                  | 200      | 1.61        | 59           | 99                                  | 8.6                            |

<sup>a</sup> Conditions for PN50-R, PN170-R and PN200-R are respectively: [NVPI]/[AIBN]/[CTA] = 25/0.25/1, 150/0.25/1 and 227/0.25/1, for 12 h, 24 h and 72 h. <sup>b</sup> Conditions of the hydrazinolysis: [PNVPi]/[hydrazine] = 1/24, in 1,4-dioxane/MeOH 1/2 at 65°C for one night. <sup>c</sup>  $M_{n,th} = DP_n^{th} \times \text{conversion} \times MM_{monomer}$ . <sup>d</sup>  $M_n^{LS}$  determined by SEC in DMF equipped with a MALLS detector,  $dn/dc_{PNVPi} = 0.131$ . <sup>e</sup> Calculated using the following formula:  $DP_n = M_n/MM_{monomer}$ . <sup>f</sup> Determined by SEC in DMF using a PMMA calibration. <sup>g</sup> Determined by elemental analysis (SI Table S1 for crude EA analysis and calculations). <sup>h</sup> Number-average molar mass calculated by the molar mass of the precursor.

**Table S3.** Characteristics of pDNA complexes made with PVAm polymers prepared via RAFT polymerization

| Entry | Polyplexes                    | polymer/pDNA<br>WR <sup>a</sup> | N/P <sup>b</sup> | $D_h^c$<br>(nm) | $\zeta^d$<br>(mV) |
|-------|-------------------------------|---------------------------------|------------------|-----------------|-------------------|
| 1     | PN50-R-plex                   | 1                               | 7                | 3490            | +27               |
|       |                               | 3                               | 22               | 150             | +37               |
| 2     | PN170-R-plex                  | 1                               | 7                | 460             | +40               |
|       |                               | 3                               | 21               | 140             | +44               |
| 3     | PN200-R-plex                  | 1                               | 7                | 90              | +23               |
|       |                               | 3                               | 22               | 130             | +40               |
| 2'    | PN170-R-OAc-plex <sup>e</sup> | 1                               | 2                | 185             | +27               |
|       |                               | 3                               | 5                | 140             | +33               |

<sup>a</sup> WR = polymer/pDNA weight ratio. <sup>b</sup> amine/phosphate molar ratio calculated as described in experimental part. <sup>c</sup> Hydrodynamic diameters  $D_h$  of the polyplexes at 298K in HEPES 10 mM, pH 7.4. <sup>d</sup>  $\zeta$  potential of polyplexes at 298K in HEPES 10 mM, pH 7.4. <sup>e</sup> Obtained by acetylation of PN170-R (degree of acetylation = 50 %).

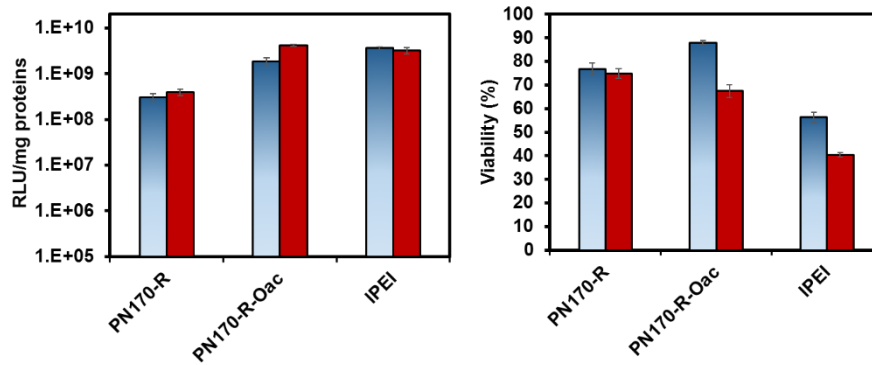

**Figure S4.** (A) Transfection efficiency and (B) cell viability of HeLa cells. Transfection was performed with PVAm (made by RAFT) before (PN170-R) and after 50 % acetylation (PN170-R-OAc) polyplexes at two polymer/pDNA ratios (ratio 1 (blue) and ratio 2 (red): lower and higher amount of polymer, Table S3). The luciferase activity was measured 48 h after the transfection and expressed as RLU/mg of protein. The cell viability was evaluated by MTT assay 48 h after transfection and expressed as percentage relative to untreated cells.

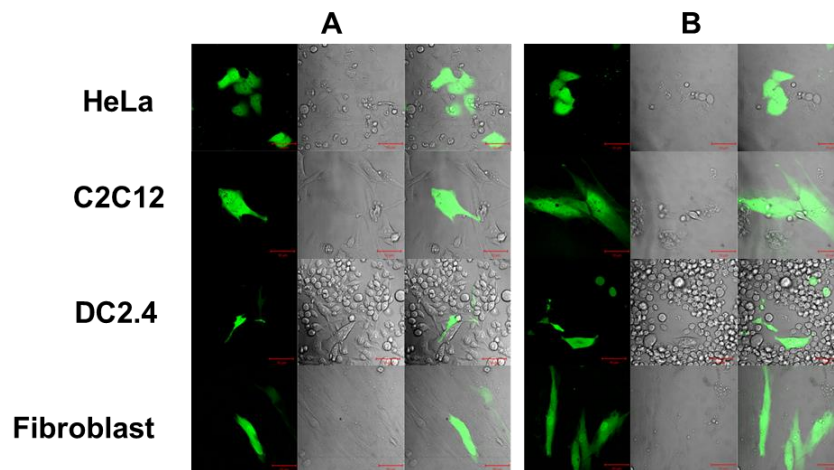

**Figure S5.** HeLa, C2C12, DC2.4 cells and fibroblasts were transfected with PM140-Fh polyplexes at N/P = 3 (A) and 6 (B) containing pDNA encoding EGFP. EGFP-positive cells were analyzed by fluorescent confocal microscopy. Fluorescence images (left), phase contrast images (middle) and their merge (right).
